# Supplementary material
Source: PubMed Central journal article supplement (PMC4339454)
Supplement: NIHMS651977-supplement-1.pdf [file NIHMS651977-supplement-1.pdf]

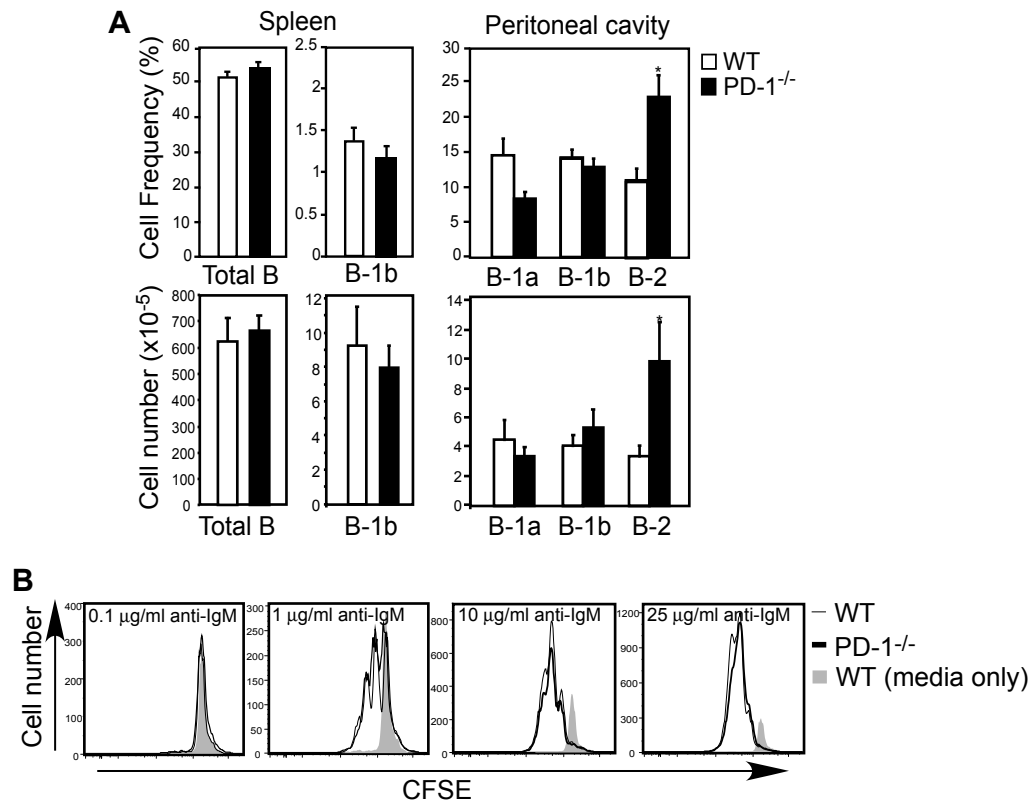

**Supplemental Figure 1.** B cell phenotypes in PD-1<sup>-/-</sup> mice. A) Mean (±SEM) peritoneal and spleen B cell frequencies and numbers in wild type and PD-1<sup>-/-</sup> mice (n=6 mice/group). B cells were defined as CD19<sup>+</sup>, B-1a cells as CD19<sup>+</sup>CD11b<sup>+</sup>CD5<sup>+</sup>, B-1b cells as CD19<sup>+</sup>CD11b<sup>+</sup>CD5<sup>-</sup>, and B-2 cells as CD19<sup>+</sup>CD11b<sup>-</sup>CD5<sup>-</sup>. Results are representative of four independent staining experiments obtained for 10-11 mice per genotype. B) Splenic B cell proliferation in response to BCR crosslinking. Purified splenic B cells were CFSE-labeled and stimulated 72 hours with F(ab<sup>c</sup>)<sub>2</sub> goat anti-mouse IgM (Jackson Immuno-research). Cells were stained with 7AAD and 50,000 total events were collected, with 7AAD<sup>neg</sup> cells analyzed for CFSE loss. Results are representative of those obtained with 3 mice per genotype.

## Supplemental Figure 1

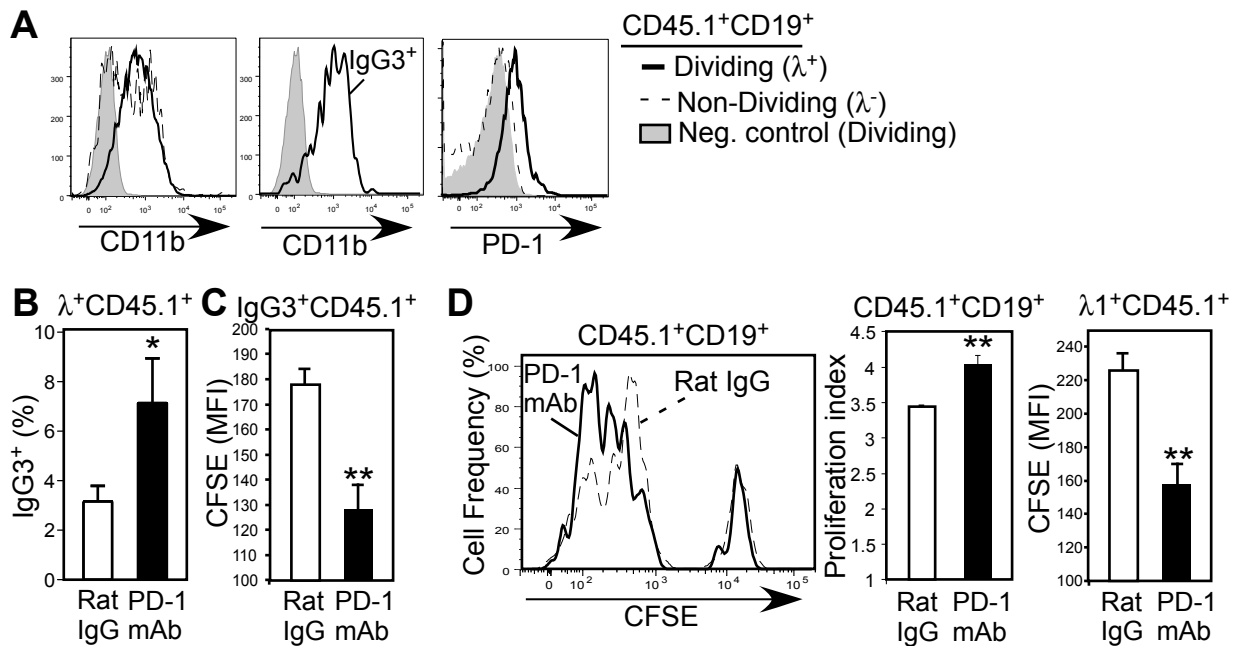

**Supplemental Figure 2.** PD-1 regulates Ag-specific B-1b cell proliferation *in vivo* via B cell-intrinsic expression. Allotype-marked (CD45.1<sup>+</sup>) peritoneal B-1b cells from B1-8<sup>hi</sup> IgH knock-in mice were CFSE-labeled and transferred into the peritoneal cavities of CD45.2<sup>+</sup> PD-1<sup>-/-</sup> mice (5 x 10<sup>5</sup>/mouse). The next day, mice (4-5/group) were immunized i.p. with 0.1  $\mu$ g NP-Ficoll (d0). On d1, mice received 200  $\mu$ g PD-1 blocking mAb (RMP1-14) or isotype control mAb i.p. NP-specific ( $\lambda^+$ CD45.1<sup>+</sup>) CD19<sup>+</sup> B cells were analyzed by flow cytometry at d3 post-immunization. A) Expression of CD11b and PD-1 by dividing ( $\lambda^+$ ) and non-dividing ( $\lambda^-$ ) CD45.1<sup>+</sup> CD19<sup>+</sup> cells and IgG3<sup>+</sup> cells (for CD11b) recovered from the peritoneal cavities of recipient mice. Gray shaded histograms indicate isotype control staining for the dividing ( $\lambda^+$ ) population. B-C) Increased IgG3<sup>+</sup> $\lambda^+$ CD45.1<sup>+</sup> peritoneal B-1b cell frequencies are found in mice treated with PD-1 blockade (B) and these IgG3<sup>+</sup> cells show increased CFSE loss relative to mice treated with control mAb (C). D) Division in the adoptively transferred CD45.1<sup>+</sup> B cell pool is increased in the spleens of mice treated with PD-1 blockade as evidenced by increased CFSE loss (left panel) and increased proliferation indices (middle panel). Significantly increased CFSE loss is also observed among high affinity  $\lambda^+$  NP-specific B cells (right panel).

## Supplemental Figure 2
